# Supplementary material
Source: Springer Nature journal article supplement (https://www.springermedizin.de/resource/supplementary/12906_2013_1861_MOESM2_ESM.pdf/9523014)

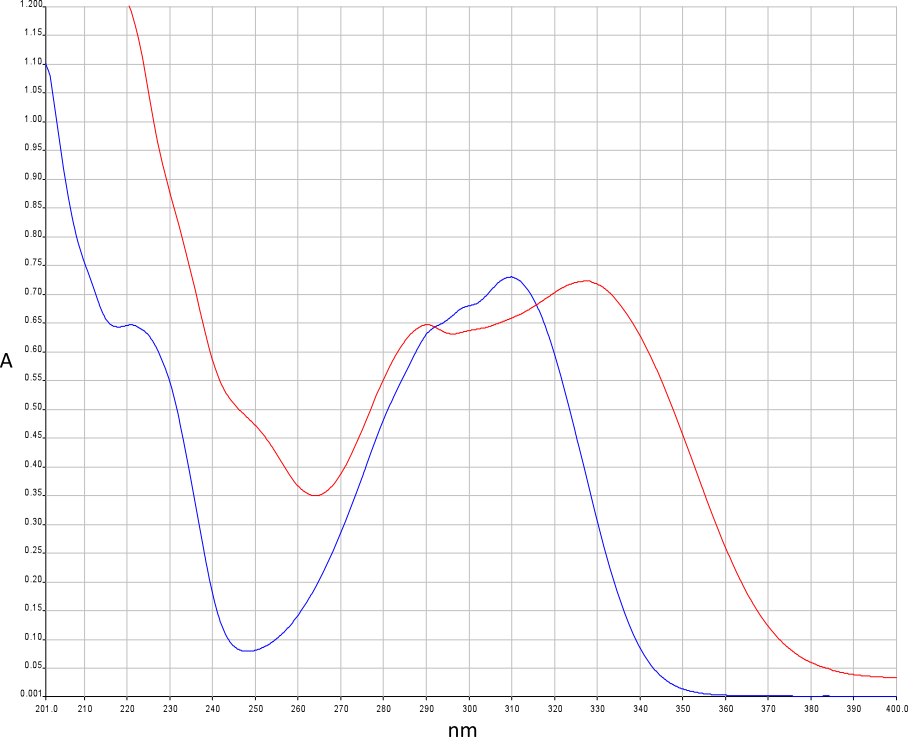

Supplement: MOESM2 [file 9523014]
